# Supplementary material
Source: Springer Nature journal article supplement (https://www.springermedizin.de/resource/supplementary/12889_2006_440_MOESM2_ESM.pdf/9500884)

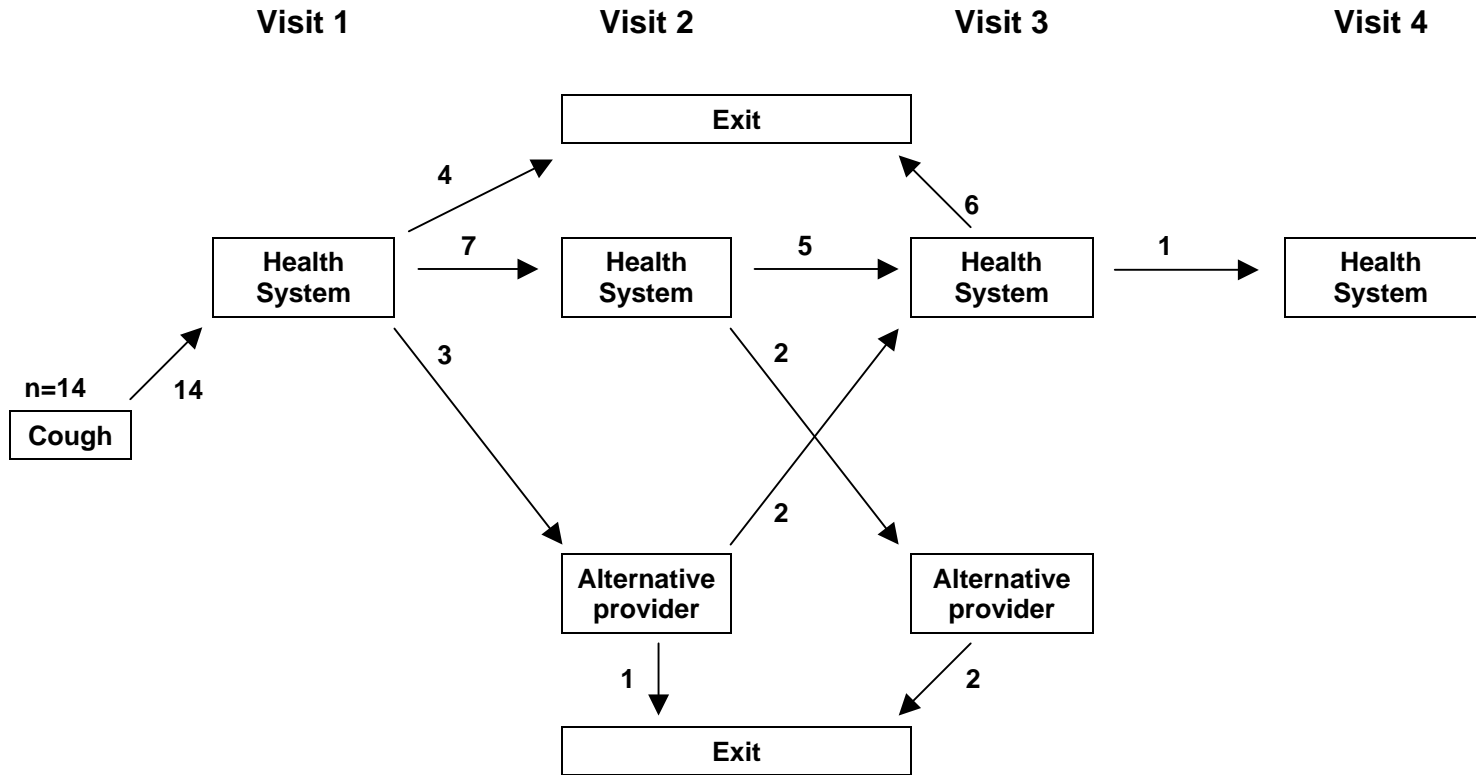

Supplement: MOESM2 [file 9500884]
